# Supplementary material for: Characterization of the Increase in Narcolepsy following the 2009 H1N1 Pandemic in Sweden
Source: MDPI journal article supplement (doi:10.3390/jcm13030652), 2024-01-23
Supplement: s1 [file s1]

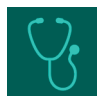

# Supplementary Material: Characterization of the Increase in Narcolepsy following the 2009 H1N1 Pandemic in Sweden

Helena Gauffin, Inger Boström, Shala G. Berntsson, Anna Kristoffersson, Mats Fredriksson and Anne-Marie Landtblom

**Table S1.** Annual number of narcolepsy patients, population, and prevalence, divided into five age groups during the years 2005 to 2017 in the Swedish population.

| Age   |              | 2005      | 2006      | 2007      | 2008      | 2009      | 2010      | 2011      | 2012      | 2013      | 2014      | 2015      | 2016      | 2017      |
|-------|--------------|-----------|-----------|-----------|-----------|-----------|-----------|-----------|-----------|-----------|-----------|-----------|-----------|-----------|
| 0–19  | Cases        | 46        | 46        | 46        | 64        | 62        | 182       | 440       | 551       | 580       | 618       | 587       | 517       | 477       |
|       | Population   | 2,159,156 | 2,169,309 | 2,178,761 | 2,183,810 | 2,187,975 | 2,183,564 | 2,176,646 | 2,176,486 | 2,189,728 | 2,209,269 | 2,239,615 | 2,290,606 | 2,339,515 |
|       | Prevalence * | 2.1       | 2.1       | 2.1       | 2.9       | 2.8       | 8.3       | 20.2      | 25.3      | 26.5      | 28.0      | 26.2      | 22.6      | 20.4      |
| 20–39 | Cases        | 200       | 165       | 196       | 194       | 238       | 248       | 380       | 412       | 496       | 596       | 685       | 737       | 845       |
|       | Population   | 2,319,620 | 2,322,803 | 2,331,671 | 2,355,172 | 2,391,779 | 2,429,690 | 2,457,057 | 2,484,477 | 2,512,096 | 2,541,030 | 2,566,502 | 2,610,359 | 2,641,608 |
|       | Prevalence * | 8.6       | 7.1       | 8.4       | 8.2       | 10.0      | 10.2      | 15.5      | 16.6      | 19.7      | 23.5      | 26.7      | 28.2      | 32.0      |
| 40–59 | Cases        | 174       | 139       | 132       | 164       | 168       | 160       | 211       | 240       | 257       | 307       | 299       | 368       | 364       |
|       | Population   | 2,430,317 | 2,434,859 | 2,441,379 | 2,442,425 | 2,444,696 | 2,450,925 | 2,467,063 | 2,483,080 | 2,498,938 | 2,522,210 | 2,539,026 | 2,554,909 | 2,568,266 |
|       | Prevalence * | 7.2       | 5.7       | 5.4       | 6.7       | 6.9       | 6.5       | 8.6       | 9.7       | 10.3      | 12.2      | 11.8      | 14.4      | 14.2      |
| 60–79 | Cases        | 200       | 193       | 218       | 219       | 209       | 219       | 263       | 273       | 279       | 288       | 292       | 278       | 285       |
|       | Population   | 1,651,496 | 1,696,032 | 1,740,154 | 1,781,827 | 1,821,847 | 1,854,487 | 1,883,871 | 1,913,702 | 1,946,385 | 1,975,438 | 2,004,224 | 2,032,385 | 2,058,183 |
|       | Prevalence * | 12.1      | 11.4      | 12.5      | 12.3      | 11.5      | 11.8      | 14.0      | 14.3      | 14.3      | 14.6      | 14.6      | 13.7      | 13.8      |
| ≥ 80  | Cases        | 17        | 31        | 28        | 33        | 26        | 32        | 47        | 40        | 52        | 52        | 59        | 79        | 73        |
|       | Population   | 487,163   | 490,254   | 490,962   | 493,113   | 494,385   | 496,904   | 498,218   | 498,148   | 497,717   | 499,408   | 501,650   | 506,894   | 512,670   |
|       | Prevalence * | 3.5       | 6.3       | 5.7       | 6.7       | 5.3       | 6.4       | 9.4       | 8.0       | 10.4      | 10.4      | 11.8      | 15.6      | 14.2      |

\* number per 100,000 inhabitants.
